# Supplementary material for: Multimodal non-invasive assessment of intracranial hypertension: an observational study
Source: Crit Care. 2020 Jun 26;24:379. doi: 10.1186/s13054-020-03105-z (PMC7318399; doi:10.1186/s13054-020-03105-z)
Supplement: Supplementary file 1 — Additional file 1 Supplemental Table 1. Number of abnormal values for each monitoring tool, according to the different forms of brain injury. Supplemental Figure 1. Correlations and Bland-Altman graphs for ICP and estimated ICP (eCIP). The continuous line shows the mean difference (bias) and the dotted lines show the limits of agreement (2.2 ± SD of the bias). Supplemental Figure 2. Correlations and Bland-Altman graphs for ICP and estimated ICP (eCIP). The continuous line shows the mean difference (bias) and the dotted lines show the limits of agreement (2.2 ± SD of the bias). The mean bias between ICP and eICP were: − 1.37 mmHg (LoA − 21.78 to 19.05 mmHg) for TBI; − 0.68 mmHg (LoA − 19.67 to 18.30 mmHg) for SAH; − 3.91 mmHg (LoA − 21.36 to 13.54 mmHg) for ICH. [file 13054_2020_3105_MOESM1_ESM.docx]

**Supplemental Material**

**Multimodal non-invasive estimation of intracranial hypertension: an observational study**

*Chiara ROBBA,1,2 Selene POZZEBON,3 Bedrana MORO, 3 Jean-Louis VINCENT, 3 Jacques CRETEUR, 3 Fabio Silvio TACCONE3*

1Policlinico San Martino, IRCCS For Oncology and Neuroscience, Department of Integrated Surgical and Diagnostic Science, University of Genova, Italy

2Neurosciences Critical Care Unit, Addenbrooke’s Hospital, University of Cambridge, United Kingdom.

3Department of Intensive Care Medicine, Erasme Hospital, Université Libre de Bruxelles, Brussels, Belgium

*Abnormal values for each monitoring tool*

The number of patients with abnormal NPI, PI, ONSD and eICP values was 17 (17%), 21 (21%), 20 (20%) and 35 (35%), respectively (p=0.01). The differences in the number of patients with abnormal NPI, PI, ONSD and eCIP between the three forms of brain injury are shown in Supplemental Table 1.

*Invasive vs. Non-invasive measurement in different forms of brain injury*

In the TBI subgroup, there was a significant moderate correlation between invasive ICP and ONSD (r =0.53, p=0.002), PI (r =0.60, p<0.001) and eICP (r= 0.66, p<0.001), but no correlation with NPI (r =-0.16, p=0.37). The AUC to predict intracranial hypertension was 0.78 [95% CIs 0.62-0.95] for ONSD, 0.79 [95% CI: 0.63-0.96] for PI, 0.83[95% CI: 0.69-0.98] for eICP and 0.61 [95% CI: 0.49-0.83] for NPI. In particular, a ONSD > 5.3 mm had 67% sensitivity and 73% specificity to predict intracranial hypertension; a PI > 1.10 had 61% sensitivity and 80% specificity to predict intracranial hypertension; a NPI < 4.0 had 61% sensitivity and 73% specificity to predict intracranial hypertension; an eICP > 20 mmHg had 67% sensitivity and 87% specificity to predict intracranial hypertension.

In the SAH subgroup, there was a significant correlation between invasive ICP and each technique, although it was strong for NPI (r=-0.77, p<0.001) and eICP (r=0.88, p<0.001) and moderate for ONSD (r=0.61, p<0.001) and PI (r= 0.53, p<0.001). The AUC to predict intracranial hypertension was 0.78 [95%CIs 0.62-0.94] for ONSD, 0.79 [95%CIs 0.63-0.96] for PI, 0.68 [95%CIs 0.61-0.75] for eICP and 0.70 [95%CIs 0.51-0.89] for NPI. In particular, a ONSD > 5.7 mm had 73% sensitivity and 85% specificity to predict intracranial hypertension; a PI > 0.98 had 71% sensitivity and 100% specificity to predict intracranial hypertension; a NPI < 4.0 had 60% sensitivity and 71% specificity to predict intracranial hypertension; an eICP > 20 mmHg had 80% sensitivity and 90% specificity to predict intracranial hypertension.

In the ICH group, there was a significant moderate correlation between invasive ICP and each technique; ONSD (r =0.56, p<0.001), PI (r =0.68, p<0.001), eICP (r =0.53, p<0.001) and NPI (r = -0.57, p<0.001). The AUC to predict intracranial hypertension was 0.90 [95%CIs 0.77-0.99] for ONSD, 0.69 [95%CIs 0.65-0.78] for PI, 0.97 [95%CIs 0.96-0.98] for eICP and 0.73 [95%CIs 0.64-0.87] for NPI. In particular, a ONSD > 5.7 mm had 72% sensitivity and 94% specificity to predict intracranial hypertension; a PI > 1.23 had 71% sensitivity and 100% specificity to predict intracranial hypertension; a NPI < 4.0 had 71% sensitivity and 94% specificity to predict intracranial hypertension; an eICP > 24 mmHg had 71% sensitivity and 94% specificity to predict intracranial hypertension.

**Supplemental Table 1.** Number of abnormal values for each monitoring tool, according to the different forms of brain injury.

|  | **ALL**  **(n=100)** | **TBI**  **(n=30)** | **SAH**  **(n=47)** | **ICH**  **(n=23)** |
| --- | --- | --- | --- | --- |
| **Abnormal NPI, n** | 17 | 4 | 8 | 5 |
| **Abnormal PI, n** | 21 | 7 | 9 | 5 |
| **Abnormal ONSD, n** | 20 | 4 | 11 | 5 |
| **Abnormal eICP, n** | 35 | 12 | 14 | 9 |
| **Intracranial Hypertension, n** | 37 | 15 | 15 | 7 |

ONSD = optic nerve sheath diameter; PI = pulsatility index; ICP = intracranial pressure; eICP = estimated intracranial pressure; NPI = neurological pupil index; TBI = traumatic brain injury; SAH = subarachnoid hemorrhage; ICH = intracranial hemorrhage

**Supplemental Figure 1.** Correlations and Bland-Altman graphs for ICP and estimated ICP (eCIP). The continuous line shows the mean difference (bias) and the dotted lines show the limits of agreement (2.2±SD of the bias).


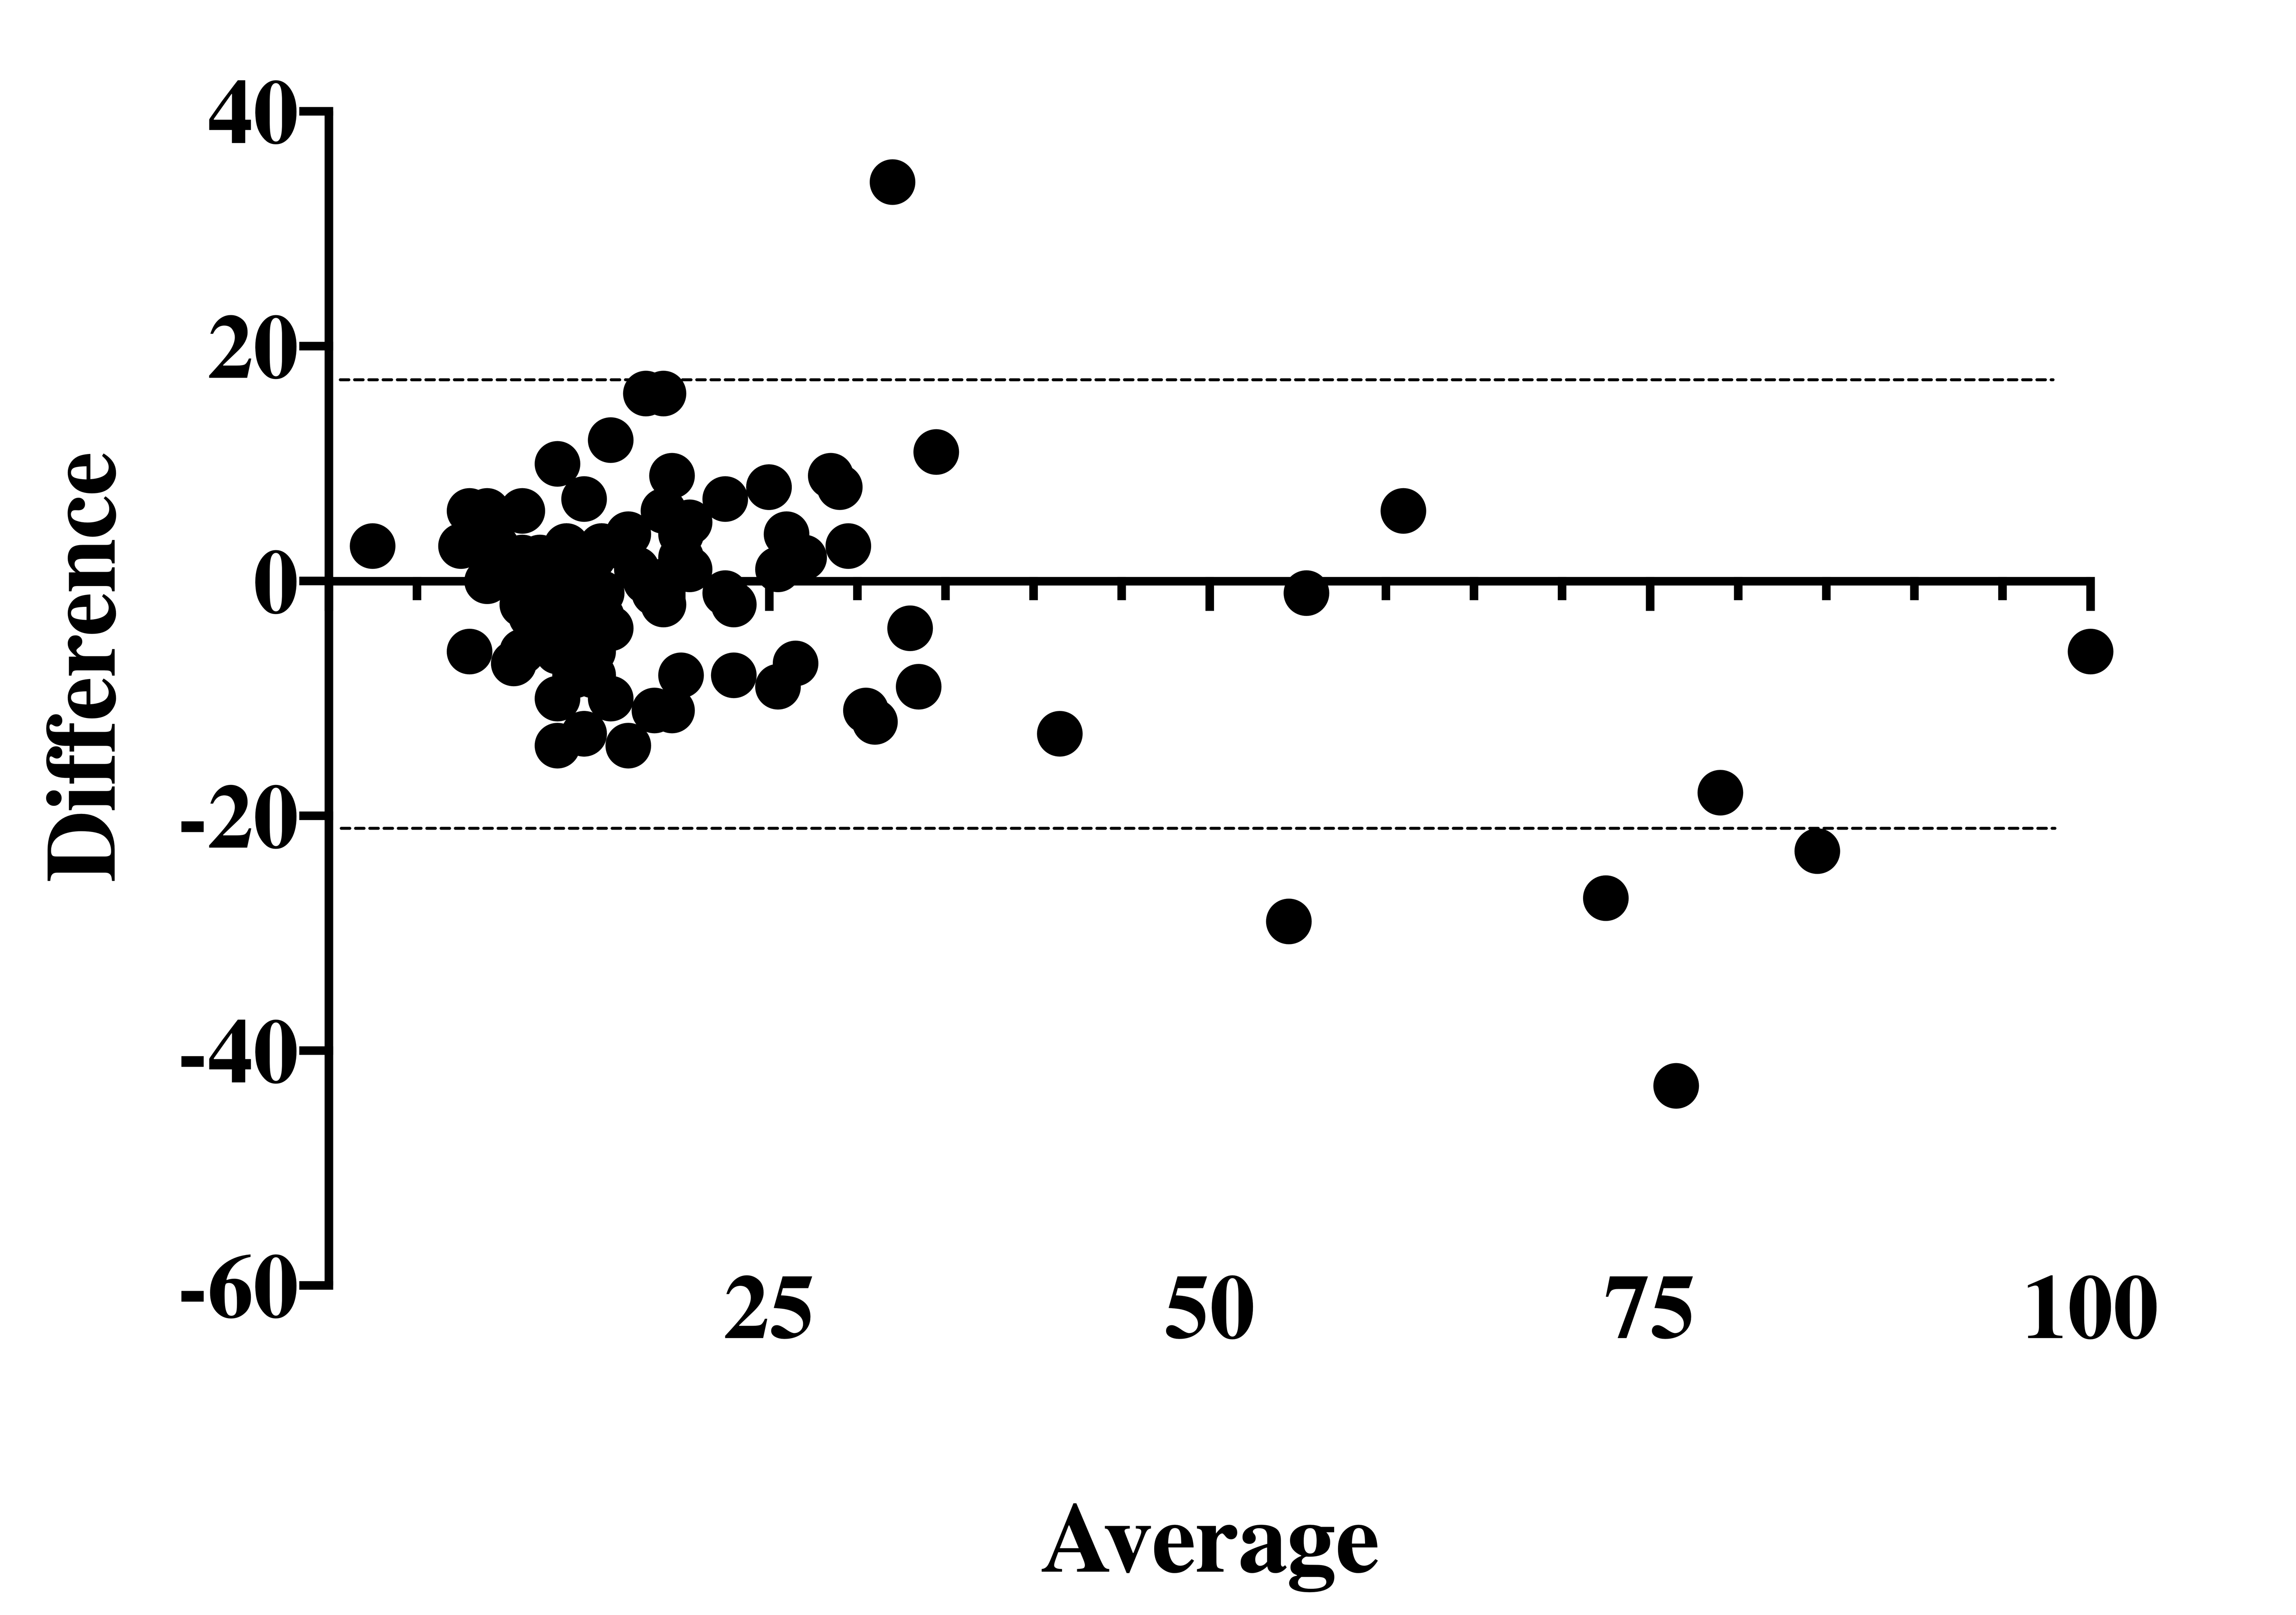


**Supplemental Figure 2.** Correlations and Bland-Altman graphs for ICP and estimated ICP (eCIP). The continuous line shows the mean difference (bias) and the dotted lines show the limits of agreement (2.2±SD of the bias). The mean bias between ICP and eICP were: -1.37 mmHg (LoA -21.78 to 19.05 mmHg) for TBI; -0.68 mmHg (LoA -19.67 to 18.30 mmHg) for SAH; -3.91 mmHg (LoA -21.36 to 13.54 mmHg) for ICH.


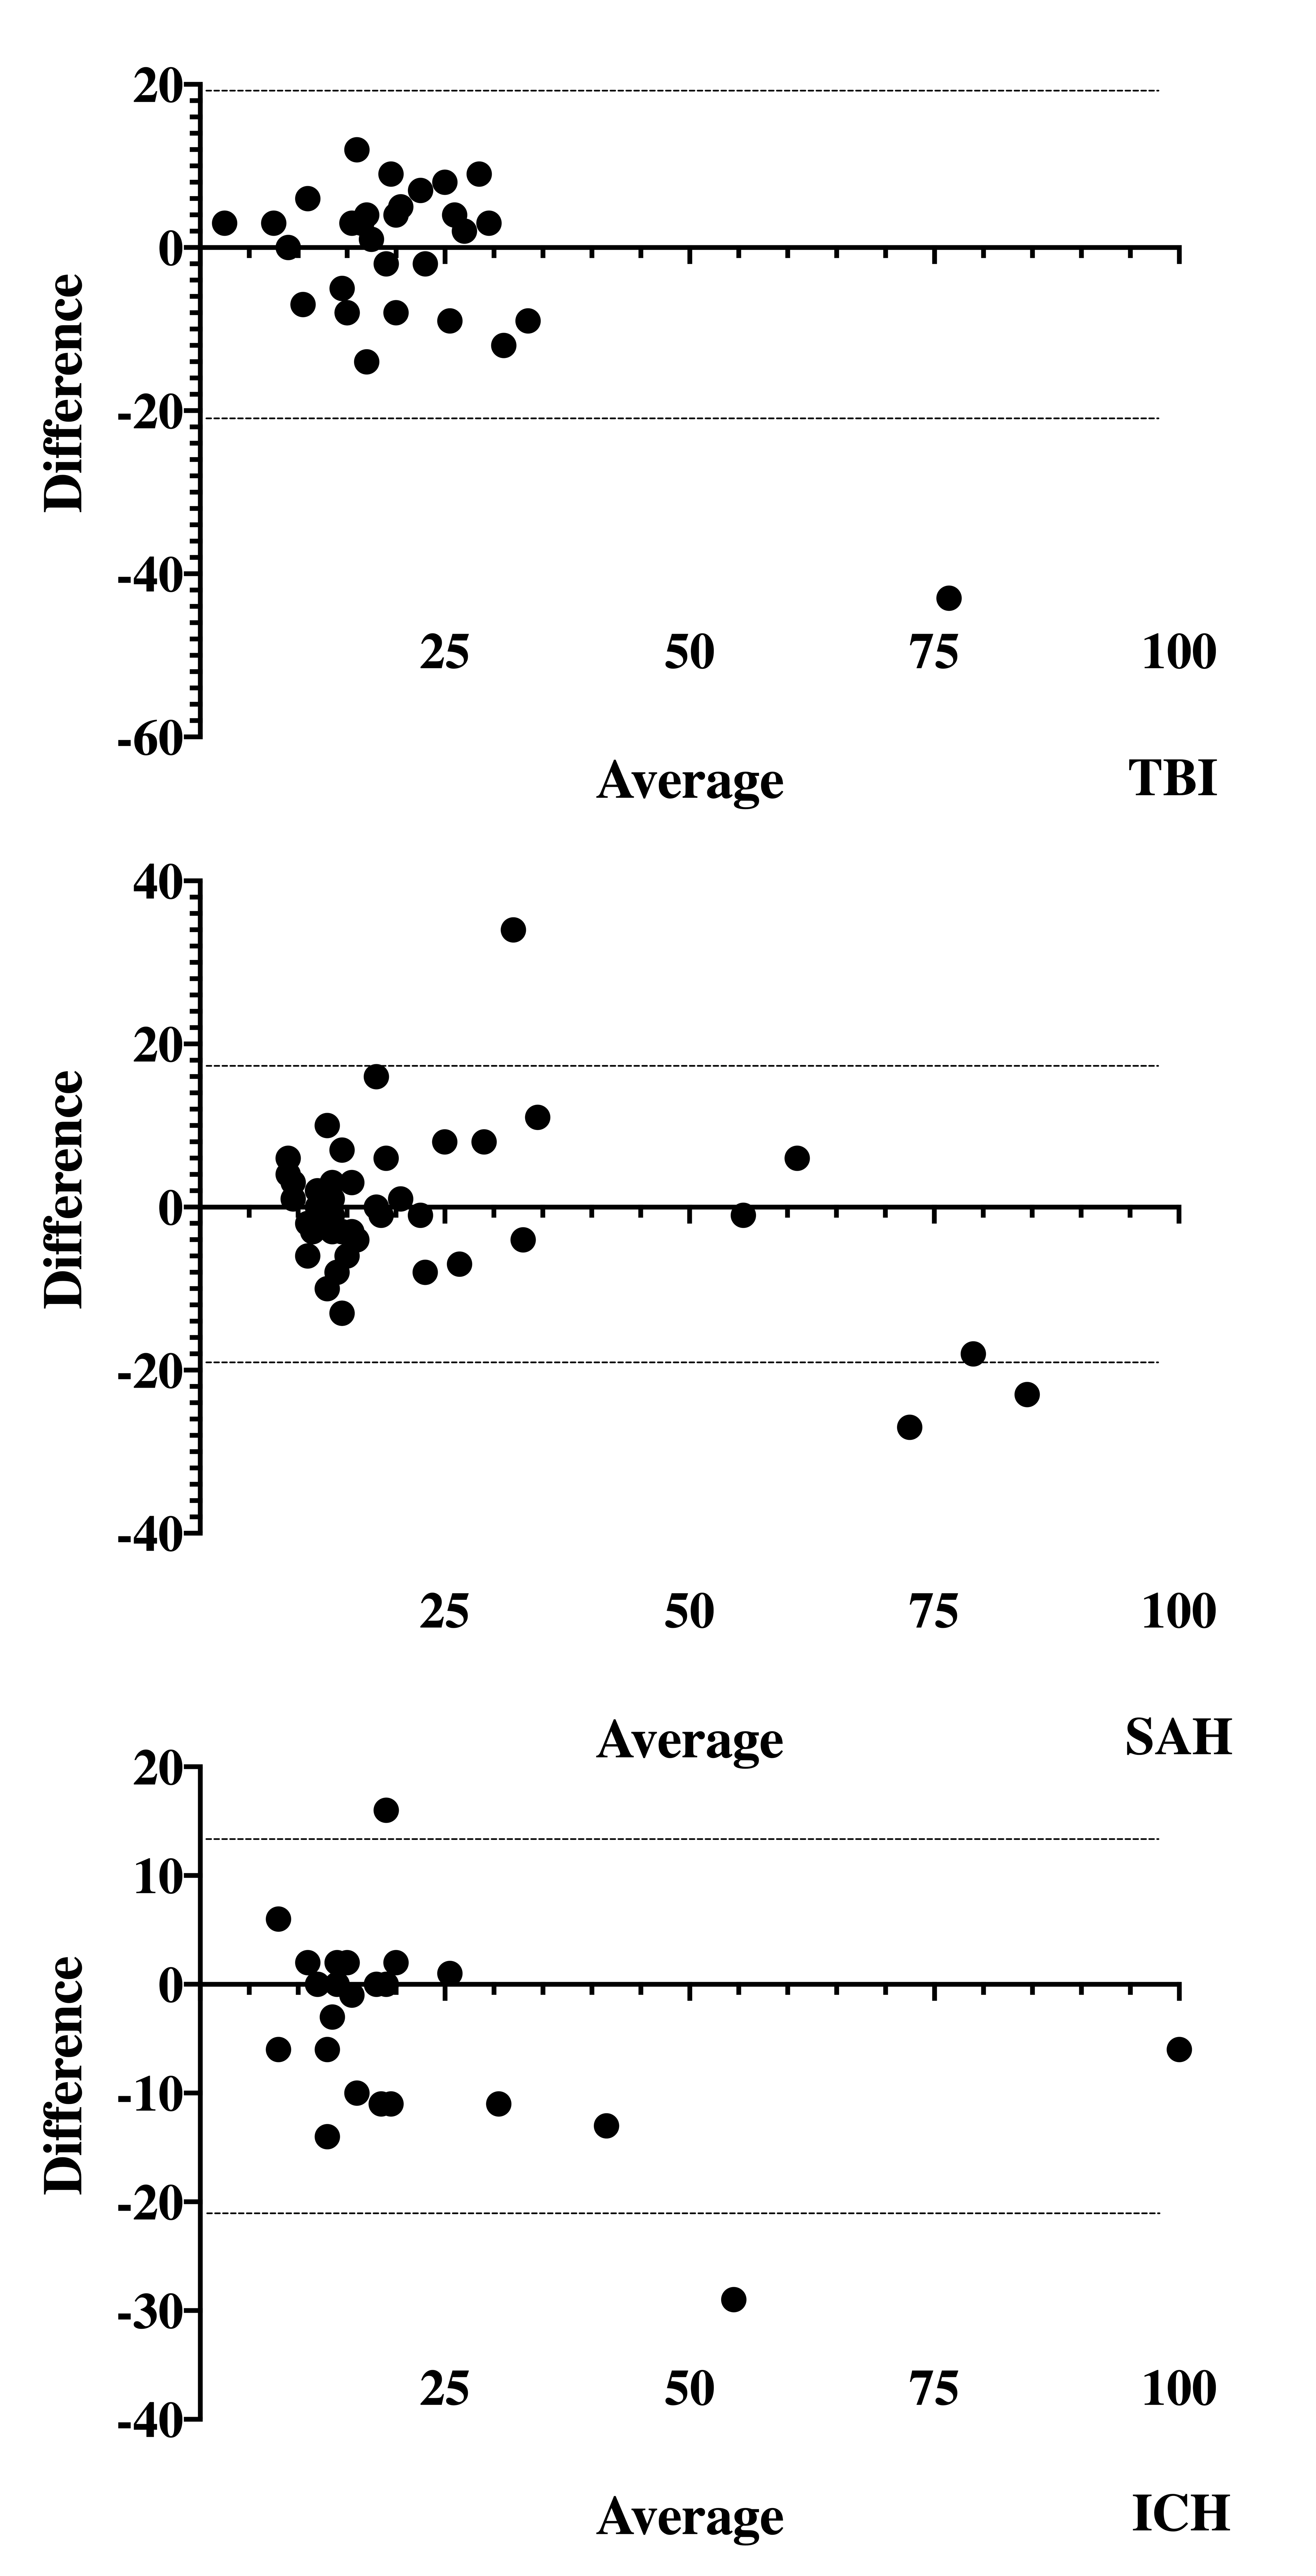


TBI = Traumatic Brain Injury; SAH = Subarachnoid Hemorrhage; ICH = Intracranial Hemorrhage
